# Supplementary material for: Cranial and mandibular shape variation in the genus Carollia (Mammalia: Chiroptera) from Colombia: biogeographic patterns and morphological modularity
Source: PeerJ. 2015 Aug 13;3:e1197. doi: 10.7717/peerj.1197 (PMC4581772; doi:10.7717/peerj.1197)
Supplement: Supplemental Information 3 — Weight matrix of the relative warps for the cranial-mandibular shape variation of C. brevicauda, C. castanea and C. perspicillata. [file peerj-03-1197-s003.xlsx]

## Sheet: Cranial
Individual	1X	1Y	2X	2Y	3X	3Y	4X	4Y	5X
------------------------------------------------------------------------
39	-0.00839	0.00321	-0.00492	-0.0064	-0.001	-0.00983	0.00506	-0.00096	0.01155
40	0.00043	-0.0027	-0.01341	0.00021	0.00513	-0.00354	0.00988	0.0023	0.00781
41	0.00833	-3e-05	-0.00701	-0.0029	0.00183	0.002	-0.0057	-0.00025	0.00206
0	0.00792	0.0019	0.00218	-0.00018	-0.00772	-0.00526	0.00458	0.00507	-2e-05
1	-0.01028	-0.00344	0.03196	-0.0015	0.00411	-0.00561	-0.0218	-0.00558	0.00469
2	0.01078	-0.0078	0.01165	0.00303	-0.00467	1e-05	-0.01004	0.01078	-0.00772
3	0.00046	0.00173	-0.01031	0.00028	-0.00186	-0.00267	-0.00396	-0.003	-0.00244
4	0.01221	0.00337	-0.005	0.00829	-0.00103	-0.00374	-0.00552	-0.00054	-0.00437
5	-0.00966	0.00207	0.00055	0.0039	0.00079	0.00256	0.00183	-0.00272	0.00881
6	0.00379	-0.00279	0.01806	-0.0029	0.00132	-0.0023	0.00018	0.00149	0.00155
7	0.00584	0.00349	0.0077	0.00279	-0.00913	0.00153	0.00526	-0.00388	0.00094
8	-0.0005	0.00055	0.0043	-0.00207	-0.0083	-0.00662	0.00955	-0.00428	-0.00408
9	0.00442	0.00172	0.00398	-0.00279	0.00099	0.00278	-0.00396	-0.00732	0.00801
10	0.00481	-0.00101	-0.00467	-0.00588	-0.00723	0.001	0.01603	0.0012	-0.00444
11	-0.00295	0.00045	-0.00533	-0.00539	-0.00018	-0.00341	-0.00442	-0.00066	0.00102
12	0.01048	-0.00113	-0.00687	-0.00444	-0.0054	-0.00048	0.00021	-0.00433	-0.00746
13	-0.0019	0.00051	0.00654	-0.00776	-3e-05	0.00264	0.0046	-0.00066	0.00541
14	-0.01345	0.00216	0.00424	-0.00247	-0.00629	-0.00298	0.00269	-0.00383	-0.0109
15	0.0081	-0.00214	-0.00121	-0.00667	-0.00399	-0.00687	-0.00246	-0.00656	-0.00379
16	-0.00643	0.01191	-0.0011	-0.0005	0.015	0.00367	-0.01679	0.0001	0.0046
17	0.0022	-0.00085	-0.00386	0.00113	0.00132	-0.00234	-0.00212	0.00635	0.00475
18	-0.0002	0.00281	0.00849	-0.00216	-0.00714	-0.00053	0.00969	0.00087	-0.0028
19	-0.02257	0.01048	-0.00413	-0.00351	0.02073	-0.00465	-0.01542	-0.0133	-0.00826
20	0.01441	-0.00097	0.00435	0.00155	-0.00412	0.0031	-0.00813	0.00363	-0.01145
21	0.00062	-0.00216	-0.00247	-0.01324	-0.00501	-0.00435	-0.01221	-0.00602	-0.00214
22	-0.00732	0.00037	0.00263	0.00277	0.00559	0.00477	0.00486	-0.00401	0.00817
23	-0.00407	7e-05	-0.00242	-0.00375	-0.00087	-0.00578	0.00393	-0.00374	0.00389
24	-0.00282	-0.00213	0.01693	-0.00305	-0.00693	-0.00479	-0.00367	0.00374	-0.00931
25	0.00558	0.00517	0.00078	0.00259	-0.00232	-0.00623	0.01186	-0.00053	0.00381
26	-0.00444	0.0055	0.00157	-0.00416	-0.00237	0.00159	0.01689	-0.0013	0.00109
27	0.01633	-0.00651	0.00546	-0.00654	0.00061	0.0011	-0.00391	-0.01167	0.00556
28	-0.00253	0.00197	0.02449	-0.00443	-0.00524	-0.00744	-0.02693	-0.0112	-0.02288
29	0.00691	0.002	0.01131	-0.00608	0.00099	-0.0014	-0.00962	-0.00428	-0.0045
30	0.00262	-0.00554	-0.0044	0.0021	0.00173	-0.00111	-0.00285	0.00205	0.00211
31	-0.01135	0.00534	-0.00645	-0.00018	0.00474	0.00292	0.01454	-0.00256	0.01102
32	0.00452	-0.00059	-0.00918	-0.0006	-0.00389	-0.00739	-0.00771	-0.00325	-0.00103
33	0.00054	-0.00095	-0.00991	-0.00012	-0.00232	-0.00256	0.00544	0.0001	0.00911
34	0.00086	0.00257	0.00026	0.00275	-0.00418	-0.00302	0.00483	-0.0022	0.00094
35	-0.00374	0.00184	-0.00112	-0.00108	-0.00578	-0.00268	0.00543	-0.00043	0.00444
36	0.00948	-0.0046	-0.00492	-0.00124	-0.00656	0.00136	-0.00162	-0.00262	0.00141
37	-0.00608	0.0041	-0.00487	-0.00157	-0.00496	-0.00275	0.00621	0.00077	-0.00093
38	-0.00543	0.00157	0.00102	-0.00327	-0.00686	0.00498	0.0105	-0.00171	-0.00391
39	-0.00824	-0.00012	-0.00423	0.00047	-0.00308	-0.00327	0.01065	-0.00471	0.00104
40	-0.00445	0.00205	-0.01571	0.00063	-0.00244	-0.00696	0.00588	-0.00067	0.00361
41	-0.01453	0.00233	-0.01677	-0.00376	-0.00691	-0.00432	0.00671	-0.00079	-0.0079
42	-0.00593	-0.00225	0.00099	-0.00268	-0.00455	9e-05	0.00139	-0.00463	0.00143
43	0.00733	-0.00553	0.00204	0.0016	0.0008	-0.00044	-0.00095	0.00128	0.00428
44	-0.00335	-0.00103	0.00504	0.00508	-0.00758	-0.00222	0.00227	0.00335	0.00025
45	0.00288	0.00134	-0.00073	-0.00556	-0.00048	-0.00728	0.00252	-0.00401	0.00346
46	-0.00242	-0.00152	-0.00364	0.00079	-0.00291	-0.00207	-0.00146	-0.00689	-0.00288
47	0.00297	-0.00089	-0.00561	-0.00989	-0.00292	-0.00326	0.00166	-0.00704	0.0007
48	-0.01398	5e-05	-0.00639	-0.00167	0.0041	-0.0058	0.00541	0.00724	0.01205
49	0.00361	0.00437	0.00382	0.00161	-9e-05	0.00104	-0.00172	-0.00146	0.00062
50	-0.0059	0.00137	-0.00547	-0.00389	-0.00317	-6e-05	-0.0042	-0.0092	-0.0001
51	-0.00709	-0.00139	-0.00627	-0.00513	-0.00626	-0.00209	0.00209	-0.00527	0.00111
52	0.00198	-0.00175	-0.01888	0.00372	0.00146	0.0011	0.00768	-0.00315	0.00694
53	0.00774	-0.00182	-0.00993	0.00233	-0.00289	-0.00277	-0.00049	-0.00339	0.00657
54	-0.0084	0.00208	-2e-05	0.00018	0.00076	-0.00212	-0.00065	-0.00354	0.00113
55	-0.00377	0.00254	-0.01162	-0.00071	-0.00114	-0.00338	0.00035	0.003	0.00286
56	-0.00167	0.00096	0.0025	-0.00452	-0.00277	-0.00182	0.00203	-0.00101	0.00278
57	-0.00601	-0.00158	-0.00769	0.00126	-0.00774	0.00148	0.00249	-0.00515	-0.00437
58	-0.00815	-0.004	0.0031	0.0048	-0.00393	-0.00052	0.02144	0.01035	0.01087
59	0.00283	-0.00183	0.01165	-0.00495	-0.00694	-0.00031	0.00105	-0.00356	-0.00793
60	-0.00522	0.00206	-0.0061	0.00342	-0.00378	0.0025	-0.0026	-0.00446	-0.00899
61	0.00883	-0.00041	-0.00411	0.00073	-0.00426	-0.00549	0.00064	-0.00375	0.00574
62	0.00032	0.00079	-0.01373	0.00163	-0.00134	0.00179	0.00253	-0.00707	0.00496
63	0.01272	0.00299	0.00776	-0.00323	-0.00031	-0.00146	-0.00077	-0.00498	-0.00049
64	0.01201	-0.00338	0.00134	-0.00067	-0.00589	-0.00173	0.0028	-0.00199	-0.00179
65	-0.00109	0.00034	-0.01228	0.00537	-0.00393	-0.00251	0.00138	-0.00314	0.00053
66	-0.00425	6e-05	-0.01371	0.00084	-0.00277	0.00036	0.00447	-0.00539	0.004
67	-0.00209	0.00107	-0.00481	-0.00602	-0.00051	-0.00168	-0.00431	-0.00198	0.00504
68	-0.00757	0.00066	-0.00652	-0.00036	-0.00181	-0.00287	0.00243	-0.00469	0.00497
69	0.00618	0.00019	-0.01536	-0.00088	-0.01039	-0.00224	-0.00128	-0.00191	-0.00369
70	0.0069	0.0039	-0.0046	-0.00246	-0.00354	-0.0001	0.00023	-0.00363	0.00289
71	-0.00204	-0.00192	-0.00952	0.00433	-0.00935	-0.0032	0.00675	0.00185	-0.00694
72	-0.00534	2e-05	-0.00308	0.0008	-0.00551	-0.00043	0.00376	0.00062	0.00036
73	0.00078	-0.00372	-0.00314	0.00091	-0.00013	0.0006	0.00442	-6e-05	0.00883
74	-0.00481	-0.00069	-0.01014	-0.00574	-0.00507	-0.00305	0.00051	-0.01005	-0.00243
75	0.00262	0.00637	-0.01194	0.00022	0.00321	-0.00611	0.00233	-0.00352	-0.00412
76	0.00306	0.0016	-0.01252	0.00034	0.00049	-0.00029	0.00353	-0.00471	0.00943
77	-0.01075	0.0006	-0.00697	-0.0025	0.0014	-0.00198	-0.00276	-0.00518	0.00385
78	0.0017	-0.0012	-0.00697	-0.00464	-0.00305	-0.00018	0.00116	-0.00709	0.00682
0	-0.00319	-0.0025	-0.00393	0.01013	0.00043	-0.00056	-0.00441	-0.00035	0.00706
1	0.00191	0.00475	0.0096	0.0027	0.00111	0.00079	0.00608	8e-05	-0.0051
2	0.01295	-0.00499	0.01138	0.0015	-0.00064	0.00096	-0.00827	0.00605	-0.00524
3	0.00264	-0.00163	0.01261	-0.00305	-0.00157	0.00453	-0.02297	0.00111	-0.00951
4	0.0006	0.00131	-0.01227	0.01441	0.01321	-0.00772	0.00895	0.00416	0.00712
5	0.00192	0.00597	-0.00024	0.0163	0.00393	0.00085	-0.00867	-0.00292	-0.01101
6	0.00245	-0.00222	0.0165	0.01164	-0.00331	0.00115	0.00274	0.00973	-0.00743
7	0.01142	-0.00479	0.00427	0.00554	0.0014	0.00217	0.0061	0.01232	0.00517
8	0.01261	-0.00565	0.0049	-0.00125	0.0001	0.00553	0.00225	0.00941	0.01217
9	0.00766	-0.00112	0.02001	-0.00483	0.00385	0.00885	-0.00934	0.00858	-0.00274
10	0.00782	-0.0014	0.01224	-0.00252	0.0002	0.00064	-0.00546	0.00525	-0.00352
11	0.01004	0.00097	0.00272	0.00076	-0.00425	0.00528	-5e-05	0.00365	-0.00467
12	0.00161	0.00471	0.00279	0.00606	-0.00195	0.00334	-0.00449	0.00113	0.00721
13	0.00083	0.00119	0.00031	0.00285	0.00421	-0.00168	0.00172	0.00485	0.01204
14	0.00465	0.00214	0.01869	0.00129	-0.00063	0.00133	-0.01222	0.00545	-0.0037
15	0.00344	-0.0005	0.02607	-0.00283	0.00057	0.00211	-0.00786	0.00189	-0.00958
16	-0.0032	0.00097	-0.00959	0.00833	-0.00044	-0.00184	0.00229	0.01099	0.00273
17	0.00465	0.00411	-0.0026	0.00055	0.00081	-0.001	-0.01184	0.00073	-0.00375
18	-0.01474	0.00285	0.00062	0.00207	0.00378	-0.00118	0.0023	0.00062	0.00528
19	-0.00289	-0.00033	0.00234	0.00115	0.001	0.00151	0.00029	-0.00349	0.00178
20	-0.00575	-0.00096	-0.00727	-0.0032	-0.00096	0.00263	0.00656	0.00275	-0.00583
21	-0.00326	-6e-05	0.00325	-0.00645	-0.00246	0.0026	-0.00944	-0.00368	-0.00945
22	-0.00255	0.00097	0.00178	-0.00734	0.00092	0.00348	-0.00291	0.00291	0.00265
23	-0.01429	0.00514	0.01504	-0.00258	0.00393	-0.00375	-0.00914	0.00745	-0.00699
24	-0.01114	-0.00378	0.00318	0.00164	0.00091	0.00406	0.00058	-0.00238	0.00031
25	0.00174	0.00106	0.0039	-0.00573	0.00012	0.00227	-0.00309	0.00453	-0.00776
26	-0.00414	-0.00173	-0.00214	-0.00212	0.01331	-0.00022	-0.00065	0.00266	0.00965
27	0.00198	-0.00146	-0.00041	0.00013	-0.00224	0.00454	-0.00143	0.00414	-0.00402
28	-0.00996	0.00562	0.00411	0.0123	-0.00471	0.00359	0.0106	-0.00729	0.00148
29	-0.00984	0.00707	0.0126	0.01255	0.00097	0.00981	-0.00364	-0.01105	0.00081
30	-0.00545	0.00499	0.00904	0.01326	0.00142	-0.0011	0.00211	-0.00596	0.00205
31	-0.00986	0.00129	-0.00207	0.01637	-0.00062	-0.00054	0.00438	-0.01243	0.00685
32	0.00046	0.00168	0.0043	-0.0014	-0.00204	0.00661	-0.00381	-0.00858	0.0027
33	0.00415	-0.00328	0.00016	-0.00661	-0.00013	0.00108	-0.00178	-0.00172	-0.00082
34	0.00795	0.00374	0.00785	0.00366	-0.00126	0.00618	-0.01658	-0.0066	-0.01743
35	-0.00472	0.00264	-0.00266	0.00086	-0.00199	0.00246	-0.00739	-0.00339	-0.01003
36	-0.01133	0.00189	-0.01351	0.0048	0.00715	-0.00122	0.00455	0.00327	0.00383
37	0.00306	-0.00247	-0.00216	-0.00494	0.0069	0.00135	-0.0106	-0.00117	0.00459
38	-0.01245	0.00274	0.00383	-0.002	0.00019	0.00057	-0.00296	-0.00202	-0.00211
39	0.00351	0.0025	-0.0168	0.00341	0.00826	0.00139	-0.00912	-0.00094	0.00325
40	-0.00245	0.00053	-0.01079	0.00746	0.00286	0.00077	0.00791	0.0023	0.0037
41	-0.00416	0.00429	-0.0002	0.00108	-0.00038	-0.00215	-0.00266	0.00196	-0.00221
42	-0.01176	0.00514	-0.00481	-0.00094	0.00235	-0.00014	1e-05	0.00696	-0.00055
43	-0.00256	-6e-05	0.00505	-0.00401	0.0075	0.00423	-0.01009	0.0013	-0.00199
44	-0.00472	-0.00025	0.00129	0.00122	-0.00086	-0.00382	-0.00584	0.005	-0.0024
45	-0.00335	-0.00057	-0.00373	-0.00065	0.0021	-0.0014	-0.0027	0.00393	0.00611
46	-0.00882	0.0033	0.00845	0.00345	0.00598	-0.001	-0.01441	0.00273	-0.00912
47	0.00266	-0.00164	0.0067	0.00181	-0.00057	0.0017	-0.00247	0.00331	0.00063
48	-0.00143	0.00373	-0.00451	0.0021	0.0008	0.00346	0.00791	-0.00182	0.00718
49	-0.00534	-0.00028	0.00516	-0.00561	0.00525	0.0037	0.00266	0.0031	0.01125
50	0.00701	0.00543	-0.00509	0.00105	0.001	0.00276	0.0027	-0.00312	0.00398
51	-0.00013	0.00107	-0.0075	-0.00454	0.00671	-0.00308	-0.00166	-0.00246	0.00014
52	5e-05	0.00486	-0.00478	-0.00267	-0.00087	0.0059	-0.00106	-0.00345	-0.00019
53	0.00107	-0.0052	-0.00413	-0.00231	-0.00102	-0.00086	0.01028	0.00568	0.0028
54	-0.00653	0.00083	-0.00074	0.00139	-0.00313	-0.00114	0.01361	-0.00231	0.00357
55	-0.0021	0.00327	-0.00614	0.00271	0.00085	0.00094	-0.00055	-0.00042	-0.0007
56	-0.00277	9e-05	-0.00839	-0.00193	0.00287	0.00178	0.00907	0.00027	0.01651
57	0.00172	-0.0002	-0.0099	-0.00285	0.00324	-0.00041	-0.0013	0.00148	0.00133
58	-0.01358	0.00393	0.00096	-0.00137	0.00392	-0.0034	-0.00257	0.00223	-0.00473
59	-0.00395	0.00081	-0.00291	0.0022	0.00181	-0.00077	-0.0031	0.00505	-0.0026
60	-0.00092	0.00057	-0.00172	0.00419	0.0032	-0.00062	0.00446	0.00814	0.00529
61	0.00711	0.00198	0.00014	0.00279	0.00679	0.00193	-0.00471	-0.00545	-0.0113
62	-0.00277	0.00036	0.00549	0.00046	-0.00391	0.00125	0.00313	0.0029	0.0048
63	-0.00147	0.00215	0.00687	-0.00579	-0.00071	-0.00562	-0.01224	-0.00116	-0.00431
64	-0.00062	0.00424	0.0086	0.00103	-0.00072	0.00025	-0.00931	-0.00416	-0.00453
65	-0.00487	0.00281	-0.00587	-0.00121	0.00836	0.0034	-0.00398	0.00112	0.00213
66	0.01225	0.00322	-0.00068	0.00093	0.00542	-0.0015	-0.01126	0.00121	-0.00472
67	-0.01195	0.00408	-0.01616	-0.00169	0.00614	0.0024	-6e-05	0.00217	0.0062
68	-0.00241	0.0036	-0.00436	-0.00623	0.00189	0.00115	-0.00135	-0.00494	0.00388
69	-0.00269	-0.00346	-0.00014	-0.00065	-0.00271	0.00145	-0.00654	0.0014	-0.00901
70	0.00441	-0.00081	0.00893	-0.00542	-0.00153	-0.00209	-0.01562	-0.0022	-0.00515
71	0.00102	-0.00248	0.00774	5e-05	0.00257	0.00453	-0.0019	0.00868	0.00547
72	-0.0134	0.00568	0.00938	-0.004	0.00299	0.00515	-0.00509	-0.00426	-0.00656
73	-0.00328	-0.00093	0.0012	-0.00305	0.00434	-0.00018	-0.00463	-1e-05	-0.00098
74	-0.00175	-0.00071	0.0018	-0.00706	0.00073	0.00219	-0.00325	-0.00425	-0.00541
75	0.01136	0.0042	0.01658	-0.00702	-0.00139	0.00362	-0.0178	-0.00324	-0.01327
76	0.00139	0.00054	-0.0055	-0.00316	-0.00028	0.00505	-0.00728	-0.00339	-0.00732
77	-0.00209	0.00049	0.0101	-0.00344	-0.00062	0.00202	-0.01029	-0.00096	-0.00957
78	-0.00852	0.0002	-0.00357	-0.00141	0.00303	0.00012	-0.00506	-0.00104	0.00129
79	0.01053	-0.00313	-0.00736	-0.0028	0.00718	0.00644	-0.01308	0.00086	0.00178
80	0.00286	0.00367	-0.00341	0.01179	0.00647	0.00608	0.01265	-0.0065	0.0056
81	0.00241	-0.00402	0.00079	-0.00764	0.00074	0.00202	0.01354	0.00746	-0.00858
82	0.00154	-0.00257	0.00199	0.00308	-9e-05	-0.00011	-0.00112	0.00307	-0.00044
83	-0.00551	0.00151	-0.00957	0.00408	0.00335	-0.00093	-0.00227	0.00524	0.00203
84	-0.00222	-0.00479	-0.00651	-0.00513	0.00032	-0.00151	-0.00182	0.00119	0.00665
85	-0.00412	0.00537	-0.00168	0.00085	0.00238	-0.00074	-0.00356	0.00258	0.00327
86	0.00403	-0.00089	0.00274	-0.00486	-0.00092	-0.00035	-0.00856	-0.00052	-0.00571
87	-0.00354	-0.00152	0.00063	-0.00128	-0.0001	0.0019	-0.00423	0.00176	-0.00794
88	-0.00692	-0.00054	0.00552	0.00207	0.00075	0.00037	0.00664	0.00471	-0.0034
89	0.00371	-0.00165	-0.02097	-0.00348	0.0033	0.00427	0.00629	-0.00445	0.00818
90	0.00048	0.00025	0.00126	-0.00231	0.00174	-0.00382	0.00127	0.00249	-0.00348
91	-0.00444	0.00332	-0.01242	0.00279	0.00248	-0.00206	0.00158	0.00206	0.00628
92	0.00133	-0.00367	-0.00616	-0.0083	0.00026	-0.00243	-0.00517	0.0064	-0.00183
93	-0.00492	0.00049	0.00579	-0.00285	0.00165	0.0014	-0.00803	0.00039	-0.0017
94	0.00527	-0.005	-0.00422	0.00029	0.00565	0.00348	-0.00895	0.00028	0.00179
95	0.00229	0.00024	0.01379	0.01211	-0.0004	0.00374	-0.01097	-0.00802	-0.0047
96	0.00946	0.00119	-0.01355	0.00287	0.00688	0.00136	-0.00199	-0.00197	0.00449
97	-0.01045	0.00019	-0.00144	-0.00577	0.00068	0.00192	-0.00159	-0.00125	-0.00061
98	-0.01278	0.00196	0.00163	0.00454	0.00287	0.00427	0.0019	-0.00093	0.00056
99	-0.00298	-0.00159	0.00421	-0.00238	0.00171	0.00105	0.00043	0.00333	-0.00305
100	0.00154	-0.0027	0.00167	0.00373	0.00417	0.00164	-0.00999	0.0018	-0.00499
101	-0.0079	-0.00403	0.00073	0.00026	-0.00051	0.00065	-0.00059	-0.00012	-0.00715
102	-0.00676	0.00325	-0.00966	0.00194	0.0007	0.00148	-0.00347	0.00168	-0.00338
103	-0.00303	0.00496	0.00272	-0.00239	-0.00185	-0.00152	-0.00237	-0.00451	-0.00306
104	0.00374	0.00192	0.00545	-0.00613	0.00417	0.00204	-0.0035	0.00245	-0.00779
105	-0.0044	-0.00314	-0.00449	0.00418	0.00121	0.00372	-0.00132	0.00521	-0.00506
106	-0.00736	0.00113	-0.00027	0.00287	0.00421	-0.00121	0.00194	-0.00077	0.00999
107	0.01428	0.00063	-0.00438	0.00541	0.00487	0.00904	-0.0046	-0.01063	-0.00245
0	-0.00079	0.0027	0.00318	0.00376	-0.00552	0.0049	0.00069	0.00198	-0.01283
1	0.01196	-0.00462	0.01403	0.00628	-0.00865	-0.00437	0.00782	0.01195	-0.00475
2	-0.00087	-0.00176	0.01023	0.00476	-0.00471	0.00035	-0.00194	-0.002	-0.00682
3	-0.00801	-0.00043	0.0101	-0.00023	-0.00199	-0.00228	-0.00165	0.00604	-0.01183
4	-0.00955	0.0012	0.00485	0.00173	0.00315	-0.00186	-0.00133	-0.00013	-0.00492
5	-0.00263	0.00511	0.00169	0.01557	-0.0009	0.003	0.00056	0.00475	-0.00966
6	0.00437	-0.00073	0.00885	-0.00389	-0.00551	0.00355	-0.00713	0.0004	-0.01755
7	-0.00063	0.00021	0.00707	0.00033	-0.00598	-0.00293	0.00407	0.00224	-0.00957
8	0.00253	-0.00155	0.00975	0.00181	-0.00193	0.0015	-0.00979	0.00044	-0.00574
9	0.00164	-0.00446	-0.00102	0.00339	0.0026	-0.00198	-0.00178	-0.00014	0.00166
10	-0.00692	-0.00105	-0.00186	0.00259	-0.00024	-0.00034	0.00246	-0.00205	0.00597
11	0.00012	-0.00144	0.00691	0.00347	-0.00516	-0.0007	0.00852	0.00676	0.00262
12	0.00613	0.00018	-0.00767	0.00118	0.00152	-4e-05	0.00524	-0.00118	-0.00315
13	0.00157	-0.00253	-0.00984	0.00037	0.00378	0.00257	0.00315	0.00165	0.00581
14	0.00584	0.00147	-0.00232	0.00775	0.00042	0.00036	-0.00884	-0.00101	0.00471
15	-0.00096	-0.00747	-0.0002	0.00132	0.00532	0.00132	0.00924	0.00491	0.01577
16	0.00168	0.00289	0.01132	0.00119	0.00064	0.00159	0.00473	0.0036	-0.00046
17	0.00182	-0.00186	-0.0068	0.00676	-0.00721	0.0015	0.01054	0.00093	-0.00416
18	0.00528	-0.00297	-0.0029	0.00388	0.00525	-0.00373	-0.00188	0.00106	-0.0005
19	0.01324	-0.00396	0.00794	-0.00363	0.00163	0.00178	-0.0065	0.00445	0.00847
20	0.01032	0.00261	0.00125	-0.00194	0.00766	0.00697	-0.00135	0.00191	0.00346
21	-0.00295	-0.00477	0.00156	-0.00108	0.0106	-0.00555	0.00303	-0.00495	0.0097
22	0.01232	-1e-05	-0.0008	0.00611	-0.00153	0.00265	0.01231	-0.00391	-0.00221
23	0.01056	-0.00363	-0.00235	-0.00056	-0.00525	0.00646	-0.00353	-0.00032	-0.01022
24	0.00333	-0.00094	-0.01262	0.00223	-0.00197	0.00127	0.00575	-0.00158	-0.00618
25	0.00314	-0.00338	0.00105	0.00375	0.01418	0.00033	0.00101	0.0031	0.01005
26	0.00055	-0.00702	-0.0083	0.00258	0.00746	0.00299	0.00503	0.00387	0.00687
27	0.00372	0.00171	0.00345	-0.00309	0.00231	0.00035	0.00126	0.00116	-0.00102
28	-0.00847	-0.00153	0.00773	-0.00078	0.00117	0.00167	0.00688	0.00231	0.00485
29	-0.00854	-0.00149	0.00802	0.00037	-0.00119	-0.00041	0.01046	0.00317	0.00145
30	0.00218	0.00235	-0.00624	0.00589	-0.0013	0.0013	-0.00452	0.00193	-0.00184
31	-0.00775	-2e-05	0.00885	-0.00354	0.00153	0.00537	0.0018	-0.00366	0.01173
32	-0.02492	-0.00081	0.01206	0.00067	-0.00524	0.00141	-0.00687	0.00371	-0.01137
33	0.00587	-0.00614	0.0023	-0.00061	-0.00108	0.00413	0.00102	0.00558	-0.00256
34	0.00416	0.0021	0.00671	0.00423	0.00687	0.00253	-0.00282	-0.00297	0.00605
35	-0.0021	0.00256	-0.00671	0.00644	-0.00132	0.00321	0.01703	-0.00526	0.002
36	0.00239	0.0063	0.00814	0.00517	-0.00413	0.00209	-0.00015	-0.00029	-0.00825
37	-8e-05	-0.00623	0.00196	0.00238	-0.00294	0.00692	0.00185	0.00361	-0.00223
38	0.01264	0.00431	-0.00668	-0.00148	0.00299	0.00235	-0.00737	0.00057	0.0034
39	-0.00355	-0.00336	-0.01506	-0.00659	0.00236	0.00359	0.01224	-0.00094	0.01259
40	-0.00509	0.00024	0.00528	0.00395	0.0019	-0.00331	0.00588	0.00862	0.00034
41	-0.00339	0.00443	-0.00521	-0.00059	0.00363	-0.00293	0.00028	0.00061	0.00242
42	-0.0088	-0.00108	-0.0099	-0.00425	-0.00048	0.00277	0.01165	0.00151	0.00384
43	-0.00303	-0.00189	-0.01188	-0.00425	0.00501	0.00089	0.0057	0.00319	0.00235
44	-0.00503	0.00024	-0.00188	-0.0038	-0.00359	-0.00057	0.00618	-0.00021	-0.00022
45	-0.0076	0.00457	-0.00494	0.00284	-0.00238	0.00092	0.01199	-0.00213	0.0058
46	0.00254	0.00687	-0.00499	0.0054	-0.00067	0.00528	0.00297	-0.00274	0.00062
47	0.00294	-0.00286	0.00682	-0.00138	0.00108	0.00189	-0.0019	0.00344	0.00446
48	-0.01723	-0.00145	-0.00357	-0.00416	0.0001	0.00102	0.00099	-0.00361	-0.00053
49	-0.00228	-0.00015	0.00424	0.00435	-0.00633	0.00404	-0.0042	-0.00074	-0.00667
50	-0.00349	0.00036	0.01118	-0.004	-0.00219	-0.00189	-0.01328	0.00321	-0.01411
51	-0.00756	-0.00476	0.00072	-0.0072	-0.00314	0.00239	0.00232	0.00016	-0.00827
52	0.00118	-0.00205	0.01134	-0.00417	0.00202	0.0048	-0.00688	0.00041	-0.0064
53	-0.00591	-0.00176	0.00199	0.00195	0.00051	0.0009	0.00686	0.00207	0.00606
0	0.00785	-0.00098	-0.0039	0.00412	0.00069	-0.0035	-0.00173	0.00168	0.00307
1	0.01314	-0.00131	0.00011	0.00297	0.00192	-0.00211	0.00598	-0.00155	0.0038
2	0.00417	-0.00854	-0.00192	-0.0044	0.00145	-0.00146	0.0125	0.00559	0.0095
3	0.00441	-0.00338	-0.01246	0.00409	0.00085	-0.00049	0.00922	0.00749	0.00199
4	0.00274	-0.0006	0.01228	-0.00901	0.00707	0.00072	-0.0016	0.00302	0.01011
5	0.00839	-0.00285	-0.00794	0.00182	0.00068	-0.00179	0.00532	0.00123	0.01256
6	0.00231	-0.01033	-0.00448	0.00419	-0.00322	0.00186	0.00898	0.00539	0.01691
7	0.00379	-0.00129	0.00269	0.00293	-0.00177	0.00399	-0.00498	0.00167	-0.011
8	-0.00079	-0.00414	-0.00417	-0.0004	0.00387	-0.00481	0.00342	0.00712	0.00566
9	-0.00293	0.00031	-0.00736	0.00735	-0.00017	0.00531	0.00436	3e-05	0.00307
10	0.00372	-0.00101	-0.00414	0.00377	0.00084	-0.00795	0.0112	0.0038	0.00695
11	0.0042	-0.00347	-0.00905	0.00262	0.00581	-0.0017	0.01513	-0.00347	0.00174
12	0.0015	2e-05	0.00619	0.00102	0.0015	-0.00027	0.00036	0.00029	0.00235
13	0.00541	-0.00625	0.00251	-0.00461	0.0029	-0.00316	-0.00127	0.00735	-0.00253
14	0.0006	0.00463	-0.01198	-0.00188	0.00225	0.00071	0.00299	-0.0027	0.00442
15	0.00825	-0.0048	0.00436	-0.01005	0.00192	-0.00011	-0.00068	-0.00455	-0.00447
16	-0.00697	0.00291	0.00574	0.00118	4e-05	-0.00243	0.00187	0.00619	0.00084
17	0.01035	-0.00042	0.01026	-0.00101	-0.00309	-0.00148	0.00254	0.00061	-0.01001
18	0.00933	-0.00086	0.00102	-0.00462	-0.00164	0.00281	0.00477	-0.00119	0.00298
19	0.00924	-0.00505	-0.00085	-0.0015	-0.00106	0.00037	-0.0026	0.00234	-0.00387
20	0.00237	-0.00071	-0.00218	-0.0021	-0.00063	0.00351	0.00113	-0.00234	0.00279
21	0.00768	-0.00108	0.00738	0.00058	-0.00237	-0.00105	-0.0026	-0.00147	-0.0015
22	0.00382	0.00024	0.00069	0.00114	-0.00567	-0.00028	0.00244	-0.00348	-0.01054
23	0.00221	0.00089	-0.00623	-0.0037	-0.00652	-0.00069	-0.00174	0.00462	-0.00299
24	0.00934	-0.00329	0.007	0.0031	-0.00565	-0.00889	0.00691	-5e-05	-0.0032
25	-0.00648	0.00404	0.01958	3e-05	-0.00025	-0.00247	0.00246	0.00293	0.00397
26	0.00781	-0.00103	0.00646	-0.00107	0.00249	-0.00258	-0.0058	-0.00452	-0.00349
27	0.0062	0.00024	0.00899	0.00108	0.00114	-0.00091	-0.0012	-0.00333	-0.00464
28	0.00558	-0.00236	0.0126	-0.00183	-0.00199	-0.00813	-0.00401	0.00493	0.00367
29	0.01509	-0.00416	0.01717	0.0018	-0.00387	-0.00386	-0.00151	0.00145	-0.00818
30	0.00105	0.00795	0.00418	-0.00531	-0.00277	-0.00179	-0.00869	-0.00409	-0.00501
31	0.00834	-0.00985	-0.00467	-0.0055	0.00114	-0.00518	0.00966	0.00202	0.00977
32	0.00385	-0.00225	-0.01649	0.0057	-0.00213	0.00318	0.01309	-0.00795	-0.00483
33	0.01138	-0.00803	-0.01133	0.00281	0.00228	-0.00175	0.01246	0.00475	0.00707
34	0.00243	-0.00386	0.00423	-0.00741	0.00187	-0.00541	-0.00593	0.00717	0.00726
35	0.00046	-0.00188	0.00858	-0.00213	-0.00296	-0.00168	-0.00243	0.00181	-0.0106
36	0.0101	-0.00202	0.00141	0.00047	-0.0054	-0.00355	0.00043	0.00462	-0.00101
37	0.00087	-0.00268	-0.00029	-0.0041	-0.00332	-0.00374	0.00312	0.00482	0.00134
38	0.00561	-0.00196	-0.00236	-0.00564	-0.00766	-0.00609	0.00232	-0.00579	-0.00805
42	-0.00314	0.00537	-0.00937	0.00467	0.00445	-0.00103	0.0027	-0.003	0.00975
43	-0.00116	0.00026	0.00217	-0.00271	0.00221	0.00057	0.0036	0.00116	0.00648

## Sheet: Mandibular
Individual	1X	1Y	2X	2Y	3X	3Y	4X	4Y	5X
------------------------------------------------------------------------
40	-0.00333	-0.00815	0.00209	0.00216	-0.008	0.00295	-0.01739	0.02013	0.01309
41	0.00872	-0.00304	-0.00527	-0.0026	0.00972	0.0014	0.0126	-0.00906	0.0123
42	-0.00604	0.00677	0.00363	-0.0051	0.00072	-0.00199	0.00531	-0.00924	-0.02218
0	-0.01301	0.00724	-0.00693	0.00082	0.00134	0.00624	-0.00783	0.0015	-0.0001
1	0.01149	0.00295	-0.00317	-0.00253	0.00089	0.0002	0.00379	0.00472	-0.0068
2	0.00489	-0.0004	-0.00343	0.00984	-0.00058	0.01015	-0.00213	0.00743	0.01213
3	-0.00766	-0.00053	-0.00614	0.00011	-0.00241	-0.00161	0.00914	0.006	0.00407
4	-0.00353	0.01436	0.00718	-0.00641	0.00687	0.00607	-0.01428	0.00396	0.01104
5	0.00306	0.00271	0.00657	-0.003	-0.00487	0.00464	0.00663	-0.00236	0.00455
6	-0.01732	0.00641	-0.00501	0.00979	0.00334	0.00015	-0.02058	0.01182	0.00028
7	0.00757	0.00591	0.00169	0.00763	0.00016	0.00289	-0.0009	0.00045	-0.00571
8	-0.00196	-0.00129	0.00046	0.00292	0.00094	0.00399	-0.00569	0.0077	-0.00279
9	-0.00173	-0.00449	-0.00282	0.00693	0.00073	-0.00199	-0.01094	0.0099	0.0123
10	-0.0024	-0.01099	0.00222	0.00545	-0.00204	0.0007	-0.01028	0.01243	0.00772
11	0.00733	-0.00189	-0.01047	-0.0011	-0.00131	0.00127	-0.00022	0.003	0.00127
12	0.01051	-0.00634	0.01129	0.0002	-0.00117	6e-05	0.00833	0.00146	-0.00508
13	0.00784	0.00434	-0.00506	0.00779	0.00503	-0.00057	0.00925	0.00207	-0.00794
14	-0.0056	-0.00172	0.0035	0.00647	-0.00063	0.00556	-0.00848	0.00546	0.00055
15	0.00335	0.00576	0.00802	-0.01017	0.00042	0.00067	-0.00924	0.01144	-0.00696
16	-0.00949	-0.01167	-0.00738	0.00147	0.00342	0.00075	-0.0436	0.01213	0.01473
17	-0.00732	0.00783	0.00227	0.00235	-0.00127	-0.00098	-0.01979	0.00429	-0.00179
18	-0.00868	0.01323	0.00367	0.00624	-6e-05	-0.00121	0.00915	0.00279	-0.01024
19	0.00075	-0.02692	-0.0063	0.00036	-0.00033	0.00443	-0.0428	0.0134	0.02036
20	-0.00402	0.00335	0.00038	0.00789	0.00331	0.0052	-0.01448	-0.00354	0.00712
21	0.00366	0.00892	-0.00407	0.00119	-0.00387	-0.00127	0.00192	-0.00033	-0.01514
22	0.01715	-0.00097	0.01717	0.00849	0.00326	0.00481	-0.05299	-0.00538	-0.02246
23	0.0024	0.00701	0.00658	-0.00546	0.0046	-0.00471	0.00191	0.01447	-0.01266
24	-0.00381	0.00021	0.00019	0.00601	-0.00098	0.00241	-0.00762	0.00881	0.00113
25	-0.00452	-0.00063	-0.02657	0.00583	0.006	0.00017	0.00608	0.01092	0.00562
26	0.00743	-0.00216	-0.00419	-0.00016	0.00106	0.00278	-0.00457	0.0033	-0.00277
27	-0.00028	0.00809	0.00091	-0.00273	-0.00946	0.00842	-0.00646	0.00115	-0.0006
28	0.01719	-0.00159	0.00536	-0.00305	0.00348	0.00339	0.00681	-0.00242	-0.01514
29	-0.00611	-0.00025	-0.0011	-0.00073	-0.00205	0.00342	-0.00417	0.01053	0.00571
30	-0.00124	0.01696	0.0046	-0.01188	-0.00413	0.00347	-0.00467	0.00046	0.00615
31	0.01311	-0.00283	-0.0071	-0.00558	0.00458	-0.00041	0.01679	-0.00927	0.00397
32	0.00127	0.00253	0.00641	-0.00455	0.00135	0.00319	0.00595	0.0031	0.00157
33	0.00448	-0.00105	0.00157	0.00214	-0.00511	0.00343	-0.0027	0.00569	0.00985
34	0.00466	0.0033	0.00052	-0.00085	0.00212	0.00192	0.01242	0.00282	-0.00103
35	0.02093	-0.00604	0.01155	0.00281	-0.00366	-0.00243	0.02003	0.00539	-0.01551
36	-0.00879	0.00845	0.00126	0	0.00538	0.00143	-0.00443	0.00447	0.01086
37	-0.0023	-0.00953	0.00482	0.00201	-0.00496	0.00347	0	-0.00038	0.01218
38	-0.01336	0.00195	0.00997	-0.00692	-0.00347	-0.00088	-0.00345	0.00935	0.00057
39	0.00897	0.00821	-0.00777	0.00689	-0.00013	-0.00425	0.00058	0.01023	-0.00746
40	0.00935	0.00323	-0.00512	-0.00562	0.0026	0.00572	0.0138	-0.00629	-0.00038
41	-0.00147	0.00652	0.01069	-0.00565	-0.00828	0.00533	-0.04508	-0.0005	-0.01168
42	0.00082	-0.00523	-0.0002	-0.00098	0.00406	0.0049	0.0065	0.01416	-0.00059
43	-0.00166	0.00096	0.00281	0.00734	-0.0007	0.00185	-0.00474	0.005	0.00461
44	0.00324	0.00036	0.00157	0.00668	-0.00653	0.00321	-0.00021	0.0095	0.00415
45	0.01624	-0.01283	4e-05	-0.00208	-0.0008	0.0004	-0.00289	0.00185	0.00764
46	0.01127	0.00305	-0.00254	-0.00226	0.00425	0.00377	0.01972	0.00305	-0.0019
47	-0.00515	0.00557	-0.0114	-0.00193	0.00647	-0.00228	0.00787	0.006	0.01713
48	-0.00438	-0.00474	0.01421	-0.00044	-0.00556	0.00546	-0.0134	-0.00254	0.00364
49	-0.00454	0.00723	-0.00246	-0.00099	-0.00761	0.00574	-0.00158	-0.00162	-0.00454
50	-0.00958	-0.0025	0.00608	0.0095	-0.00516	0.00188	0.00027	0.00804	-0.00154
51	-0.00563	0.01001	0.00645	-0.00305	-0.00306	0.00547	-0.00788	0.01	0.00172
52	0.02395	-0.00303	0.00076	-0.00451	-0.00349	0.00067	0.02457	0.00619	0.00048
53	-0.00698	0.00575	0.00025	0.00419	-0.00927	0.00107	-0.00572	0.00113	-0.00783
54	0.01274	0.00256	0.00528	-0.00716	-0.0006	0.00164	0.00721	-0.00633	-0.00144
55	0.00755	-0.01573	-0.00364	0.0048	-0.00163	-0.0013	0.0088	-0.00822	-0.00443
56	0.00116	-0.00064	-0.00598	0.00191	0.00197	0.00018	-0.01299	0.0012	0.00968
57	-0.01445	0.00567	-0.00755	-0.00547	-0.00179	0.00121	-0.01241	0.00505	0.01858
58	0.00341	0.00068	-0.00401	-0.00518	0.00262	0.00488	0.01674	0.00982	0.00856
59	-0.00247	-0.0056	0.00594	0.00104	-0.00514	-0.00533	0.00341	0.00687	-0.00032
60	0.00613	0.00635	0.00575	0.00401	-0.00402	-0.00516	-0.019	0.00375	0.00144
61	0.004	-0.00434	0.01237	1e-05	-0.00077	0.005	0.00664	0.0063	-0.00573
62	-0.0018	0.00309	0.00284	0.00062	-0.00274	0.00039	0.00082	0.00572	-3e-05
63	0.00511	-0.00703	0.00247	-0.00335	0.00467	0.00012	0.02051	0.00267	-0.0022
64	0.00158	-0.00113	0.01015	-0.01063	0.00245	0.00246	0.0074	0.00061	-0.00631
65	0.01121	0.00353	0.00907	-0.00947	-0.0015	0.00085	0.01765	0.00038	-0.01585
66	-0.00653	0.00268	0.00572	-0.00788	-0.00133	-0.00034	-0.00065	0.00324	0.00325
67	0.01207	0.0002	-0.00951	-5e-05	-0.00086	0.00409	-0.00437	0.00232	0.00361
68	-0.00376	-0.00586	0.00149	0.00607	-0.00142	0.00561	-0.00689	0.01512	0.00551
69	-0.00551	0.00867	0.00058	0.00209	-0.0024	0.00266	-0.02264	0.01246	0.01692
70	-0.00621	0.00064	-0.00483	-0.00193	-0.00174	0.00438	-0.00014	0.00277	0.00529
71	-0.01049	0.00259	0.01448	-0.00475	-0.00677	-0.00318	-0.01626	0.00454	0.00737
72	0.00581	0.00264	0.00201	-0.00198	-0.0009	0.0021	0.00038	0.00164	0.00327
73	-0.00228	0.00148	0.00581	-0.00287	-0.00437	0.00219	-0.01474	0.00161	0.00736
74	-0.00122	0.00326	0.00375	-0.00483	-0.00568	-0.00054	-0.00725	0.00514	-0.00019
75	0.01851	-0.00252	0.01205	-0.00741	-0.00029	0.00278	0.01209	-0.00259	-0.00109
76	0.00534	0.0007	0.00187	-0.00398	-0.00487	-0.00201	-0.0113	-0.00292	0.00852
77	0.00179	-0.00014	0.00707	-0.00407	-0.00293	0.00137	-0.01368	0.0022	0.01108
78	0.00534	0.00932	-0.00116	-0.00519	-0.00679	0.00225	-0.00664	-0.00043	0.01155
0	-0.00181	-0.00096	-0.00489	0.00581	0.00095	-0.00091	-0.02297	0.00777	0.00408
1	-0.00658	-0.00819	-0.00219	-0.00035	0.0029	-0.00078	-0.00835	-0.00076	-0.00483
2	-0.00688	2e-05	-0.00173	0.00228	0.00034	-0.00281	-0.00984	0.00514	0.00615
3	-0.00809	0.01261	0.00292	-0.00632	0.00384	0.0003	-0.0073	-0.00132	0.00859
4	-0.01367	0.00189	-0.00339	0.00191	-0.00294	-0.00524	-0.00439	-0.0036	0.00695
5	-0.01035	0.0037	-9e-05	0.00534	-0.00682	-0.00469	-0.00339	-0.00017	-0.0021
6	-0.00804	0.00084	-0.00274	0.00734	0.00481	-0.00264	-0.00796	0.00858	0.00182
7	-0.01304	-0.00457	-0.00903	0.00881	0.00376	-0.00199	0.00066	-0.00153	0.01118
8	0.00177	-0.0046	0.00055	0.00616	-0.00399	-0.00636	-0.00974	0.00538	-0.00524
9	-0.00543	-0.00988	-0.01259	0.00806	0.0009	0.00219	-0.01369	0.00425	0.00936
10	0.00479	-0.008	0.00081	0.00182	0.00303	0.00233	0.01432	-0.00085	0.00593
11	-0.00889	0.00354	0.0056	-0.00114	0.00091	0.00537	-0.00237	-0.0013	0.00361
12	-0.00256	-0.00025	-0.00707	0.00315	-0.00294	0.00371	0.00218	0.0038	-0.00688
13	0.01794	-0.00455	0.01367	-0.00035	-0.00595	0.01076	-0.02547	-0.00019	-0.0341
14	0.01904	-0.00043	0.00296	-0.00863	-0.0049	-0.00217	0.0299	-0.00712	-0.00996
15	-0.00504	-0.00291	0.00228	0.00468	0.00268	0.00375	-0.00768	0.01289	0.00608
16	-0.00576	0.01272	-0.00752	-0.00291	0.00354	0.00162	0.0119	-0.01019	-0.00528
17	-0.00072	0.01142	0.00104	-0.00697	-0.00203	-0.00108	-0.00089	-0.00507	0.00841
18	0.00016	0.00384	-0.01097	0.00692	0.00505	-0.00179	0.00387	0.01413	0.0014
19	0.01264	-0.00248	-0.01692	0.00646	0.00131	-0.0016	-0.0045	-0.00049	-0.00023
20	-0.01011	0.0019	-0.00247	-0.00503	0.00353	0.0055	-0.0074	0.00269	-0.00699
21	0.01914	-0.0037	-0.00023	0.00057	0.00474	0.00126	-0.00546	-0.00208	-0.01568
22	0.00875	-0.0017	0.00441	0.00154	-0.0024	-0.00259	-0.00549	-0.0026	-0.0058
23	0.01686	-0.00434	0.00382	-0.00566	0.00968	-0.00123	0.00397	0.00149	-0.01459
24	0.01047	-0.0025	-0.00549	0.00309	0.00678	0.00093	-0.01215	0.00033	-0.00178
25	0.01934	-0.00713	0.00395	0.01142	0.00495	-0.00744	0.00567	0.00584	-0.00084
26	0.01147	-0.00284	-0.02136	0.00449	0.00154	-0.00393	-0.00594	-0.00361	-0.00071
27	0.01212	-0.00711	0.00635	0.00359	-0.00441	-0.00131	0.00818	0.00046	-0.0083
28	0.01094	-0.00243	-0.00022	0.00346	0.0048	0.0006	-0.00279	0.00604	-0.00326
29	-0.0056	-0.01876	-0.00112	0.00422	0.00594	0.00078	-0.01934	-0.00266	0.02264
30	0.00235	0.00586	-0.00271	0.00241	-0.00326	0.00217	-0.02447	-0.00196	0.00795
31	-0.00424	0.00595	-0.01623	0.00407	0.00348	-0.00032	-0.00329	0.00058	-0.00087
32	0.00777	0.0055	0.00033	-0.00512	-0.00076	0.0025	-0.0005	0.00149	-0.00667
33	-0.00185	-5e-05	-0.01116	0.00456	0.0046	-0.00283	-0.00262	-0.0021	-0.01683
34	0.01177	0.00282	0.00478	-0.00457	-0.00189	-0.00029	0.00992	-0.00718	-0.01661
35	0.0055	-0.00052	-0.00472	0.00464	0.00323	-0.00186	0.00698	0.00476	-0.00019
36	0.00851	0.00447	-0.00524	0.00475	-0.0011	-0.00458	0.00215	0.01422	-0.01497
37	-0.01099	-0.0041	0.00694	0.0041	0.00176	-0.00029	-0.00864	-0.00627	-0.01064
38	0.01342	-0.01104	0.00201	-0.00049	0.00031	0.00126	0.00059	0.00323	-0.00542
39	0.00622	0.00127	-0.00084	-0.00082	0.00522	0.00049	0.00932	-0.00059	-9e-05
40	-0.01047	0.00733	0.0054	-0.00596	-0.00096	0.00254	0.00367	-0.00396	-0.00607
41	-0.00283	0.00236	-0.01217	0.00027	0.00978	-0.00528	-0.00411	0.00528	0.00028
42	-0.00788	0.00202	-0.00896	0.00177	0.00209	0.00044	0.00087	-0.0058	0.00057
43	-0.00984	0.00058	-0.00037	-0.00313	0.00611	0.00251	0.00209	-0.00148	0.00895
44	0.00298	0.00296	-0.00319	-0.00422	0.0002	-0.00298	9e-05	-0.02008	-0.00245
45	-0.01874	0.00243	-0.00713	-0.00113	-0.00199	-0.00736	-0.01902	0.00262	0.00915
46	-0.01036	-0.00304	-0.00102	-0.00218	-0.00672	-0.0024	-0.01409	-0.00811	0.00059
47	-0.01065	-0.00126	-0.00955	0.00146	0.0037	-0.00424	-0.01514	-0.00987	0.00409
48	-2e-05	-0.00729	-0.00579	0.01093	0.00351	0.00578	0.00232	0.00282	0.00684
49	0.01002	-0.00059	-0.0059	0.00812	0.00308	0.00091	0.00353	0.00149	-0.00173
50	0.00749	0.00137	0.00143	0.00502	-0.00124	0.0046	-0.00773	-0.00688	0.00892
51	0.00633	-0.00211	-0.00471	0.0017	-0.00036	-0.00279	0.0278	0.00641	-0.00324
52	-0.00143	-0.00327	-0.00937	0.00588	0.00243	-0.00066	0.02973	0.00487	0.00638
53	0.00919	-0.00447	-0.0049	0.00391	-0.00103	-0.00327	0.00338	-0.0061	0.00436
54	-0.01325	-0.00211	-0.01873	0.00558	-0.00215	-0.0021	-0.0017	0.00025	0.00842
55	0.00085	0.00096	-0.00755	0.00475	0.00234	-0.00138	-0.00461	-0.00127	-0.00092
56	0.01464	0.00512	-0.01218	0.00718	-0.00293	-0.00499	0.01824	-0.008	0.00286
57	0.00318	0.00297	0.01144	-0.00183	-0.00554	0.00356	0.00412	-0.00723	-0.01133
58	-0.01308	-0.00849	0.00083	0.00345	0.00099	-0.00345	-0.00844	-0.00838	0.00266
59	-0.00168	-0.00995	-0.00626	0.00778	-0.00332	-0.00119	0.00158	-0.00237	-0.00382
60	-0.00475	-0.00719	-0.00291	0.0025	-0.00672	0.00181	0.0082	-0.00305	-0.01052
61	0.01595	-0.00827	-0.00561	0.0074	0.00011	0.00106	0.00841	0.00508	-0.00871
62	-0.01136	0.00142	0.0189	0.00062	0.00261	-0.0059	-0.03605	-0.00378	-0.02866
63	-0.00509	-0.00345	-0.00726	0.00497	-0.00087	-0.00192	-0.0112	-0.00617	0.00031
64	0.00634	0.00355	-0.01364	0.00266	0.00111	0.00342	0.02682	-0.00256	-0.00584
65	-0.00083	0.00539	-0.00419	0.00536	0.00188	-0.00193	0.0021	-0.00352	-0.01011
66	0.00883	-0.00189	0.00067	0.01301	0.00052	-0.00295	0.00889	-0.00129	-0.00366
67	-0.02987	0.00333	0.00571	0.00128	0.00328	-0.00326	0.00814	-0.01402	-0.00193
68	-0.01398	0.00459	-0.00196	-0.00193	0.00999	-0.0023	-0.01167	-0.00182	0.00383
69	0.00824	-0.00554	0.00163	-0.00084	-0.00374	-0.00069	0.01136	-0.00079	-0.00278
70	-0.0042	0.00181	-0.0067	0.008	-0.00168	0.00288	-0.00493	0.0106	0.0016
71	0.01484	0.00536	-0.0008	-0.00195	0.00188	0.0006	0.02116	-0.00469	-0.00091
72	0.0095	-0.00176	-0.00463	0.00098	0.00241	0.00143	0.023	-0.01353	-0.00244
73	0.0065	-0.00082	-0.00038	0.00633	-0.00386	0.00422	0.00584	-0.00183	-0.00581
74	0.01476	-0.00012	-0.009	0.00033	-0.00087	0.00192	0.0002	0.0063	0.00253
75	-0.00658	0.00356	-0.00016	0.00148	-0.00197	0.00094	-0.01078	-0.00195	0.00351
76	-0.01086	-0.00395	-0.00886	0.00501	-0.00037	-0.00253	0.00043	-0.00069	0.0192
77	-0.01636	0.00121	-0.00177	0.00924	-0.00433	0.003	-0.00422	0.00241	0.00863
78	-0.01196	-0.0029	-0.00304	-0.00113	0.00114	0.00232	-0.00431	0.01607	0.01602
79	-0.01457	-0.00519	-0.01172	0.00018	0.01333	-0.00172	-0.00116	-0.00258	0.00916
80	0.02175	-0.00322	-0.00622	-0.00117	-0.00158	0.00239	0.01953	-0.00932	-0.00479
81	-0.00209	0.00095	-0.00113	-0.00046	-0.00323	-0.00279	-0.00012	-0.00216	-0.00217
82	-0.00027	0.00336	-0.00969	0.00505	0.00079	-0.00366	0.00762	-0.00039	-0.00271
83	-0.00848	3e-05	-0.01015	0.00177	0.00216	-0.00406	0.00987	0.00451	0.00413
84	-0.01344	-0.00203	-0.00622	0.00616	-0.00114	0.00289	0.00728	0.00308	0.00911
85	-0.0123	0.00458	0.0006	0.00101	0.00035	0.00431	-0.00631	0.00185	0.00078
86	-0.00314	0.00089	-0.0034	-0.00453	0.00658	0.00243	-0.00694	0.00492	-0.0022
87	-0.01552	0.00826	0.01211	-6e-05	-0.00096	-0.00192	-0.00976	0.01181	-0.00312
88	0.00478	-0.00148	0.00132	0.00357	-0.00208	-0.00044	0.00572	-0.0045	0.00151
89	-0.00082	0.00405	-0.00152	-0.00622	-0.00659	-0.00405	0.01392	0.00495	-0.01202
90	-0.00383	-0.00521	0.00201	-0.00065	-0.0003	-0.00039	0	-0.01048	-0.0036
91	-0.0036	0.00271	-0.00654	0.00568	-0.00261	-0.00047	-0.01646	0.00535	0.00795
92	-0.02049	-0.00348	0.00021	0.00371	0.00074	-0.0021	-0.02818	0.00189	0.0184
93	0.00771	0.00393	0.00799	0.00369	-0.00436	-0.00858	0.00679	0.00321	-0.00088
94	-0.00184	-0.00212	0.00547	0.00467	0.0012	0.0052	-0.00972	-0.00116	0.00337
95	0.00026	0.00725	0.00815	-0.00184	-0.0011	0.007	0.01286	-0.01309	-0.01792
96	-0.00565	0.00376	0.00719	-0.00032	-0.00555	-0.00206	0.01243	0.00141	-0.00865
97	0.00043	-0.0008	-0.00707	-0.0006	-0.00245	-0.00192	-0.00916	-0.0039	0.0054
98	-0.01161	-0.00315	-0.00244	0.00569	0.00065	0.00282	0.00292	0.00158	0.00495
99	-0.01366	-0.00271	0.00797	0.00133	0.00293	-0.00101	-0.00373	-0.01108	-0.00872
100	-0.0078	-0.00124	0.00223	0.0026	-0.00157	-0.00229	-0.00262	-0.00467	-0.00111
101	0.00255	-0.00254	-0.00433	0.00061	0.00315	0.00214	-0.00204	-0.00371	0.00015
102	0.00496	-0.00747	-0.00222	-0.00103	0.00316	0.00595	0.01952	0.00115	-0.01099
103	0.01974	0.00174	-0.0044	-0.00419	-0.00039	-0.00323	0.02508	-0.01019	-0.0096
104	0.00075	0.00182	-0.00131	0.00089	-0.00199	0.00441	0.01252	0.00599	-0.00162
105	-0.00399	0.00455	0.00755	-0.00485	-0.00045	0.00395	0.00032	-0.00828	-0.0013
106	-0.01347	-0.00388	0.00405	-0.00026	-0.00589	-0.00342	-0.01616	0.00449	-0.00374
0	0.01446	-0.00283	-0.00143	-0.00044	0.00164	-0.00432	-0.00471	0.00012	0.00021
1	-0.0034	0.0073	-0.00428	0.00764	0.0012	-0.00245	-0.00543	-0.00367	0.01099
2	-0.00069	-0.00296	0.00288	-0.00383	0.00442	-0.00079	0.02145	-0.0068	-0.01969
3	-0.00432	-0.00237	-0.00372	-0.00148	0.00339	0.0044	-0.03706	0.00095	0.01875
4	-0.00576	-0.00199	0.0036	-0.00391	0.00395	0.00279	0.00341	-0.00246	0.00349
5	-0.00589	0.00586	0.00643	-0.00147	0.00692	-0.00152	0.03112	-0.01146	-0.00618
6	0.00347	-0.00237	-0.01137	-0.00146	0.00576	-0.00307	0.0021	-0.00565	0.0137
7	-0.00054	-0.00682	0.00412	-0.00055	-0.00749	-0.00116	-0.02265	0.00409	0.01959
8	-0.00489	0.00503	0.00532	-0.00095	0.00555	0.00639	-0.02133	0.00285	0.01269
9	0.0028	-0.00373	0.00619	0.00544	-0.00478	-0.00619	0.00366	-0.0018	-0.00776
10	-0.00415	0.00295	0.00316	-0.00528	-0.00434	0.0011	0.0006	-0.00426	-0.00901
11	-0.00141	0.00473	0.00696	-0.00069	0.00047	-0.00402	-0.00231	-0.00616	-0.00808
12	-0.00531	-0.00269	0.00076	-0.00276	0.00014	3e-05	-0.00069	-0.00804	0.00727
13	-0.01915	-0.00068	-0.00868	0.00143	-0.00347	-0.00116	-0.00438	-0.00439	0.01556
14	0.00027	-0.00821	0.002	0.00206	0.00356	-0.00416	0.00147	0.00804	-0.00025
15	-0.0011	-0.00578	0.00157	-0.00407	-0.00256	0.00088	0.00202	0.00655	0.00707
16	0.01983	-0.00169	0.00063	0.00126	0.00875	-0.00337	0.02083	0.00105	-0.00568
17	-0.0015	0.00223	-0.00367	0.00359	0.00682	0.00685	0.02381	-0.00954	-0.00325
18	-0.00257	0.00417	0.00335	-0.00721	0.00146	-0.00022	-0.01325	-0.00038	0.0032
19	-0.00196	-0.00273	0.00877	-0.00023	-0.00164	-0.00096	0.00729	0.00109	-0.01862
20	-0.0037	0.00113	-0.00742	0.0054	0.00489	-0.00444	0.00162	0.00124	-0.00071
21	-0.00779	0.00077	0.00535	0.00047	0.00339	-0.00975	0.00276	-0.00835	-0.00492
22	-0.00609	0.00052	0.00379	0.00299	0.00205	-0.00169	0.00053	0.00565	-0.0007
23	-0.00364	-0.00408	0.00214	-0.00641	0.00339	-0.00014	-2e-05	-0.00261	-0.00445
24	0.00695	0.00026	-0.00653	0.00602	0.00299	-0.00562	-0.02377	0.00074	0.0149
25	0.00381	0.00631	-0.00759	-0.00112	0.00575	-0.00233	0.00183	-0.01141	-0.00908
26	0.00602	-0.00582	-0.00506	0.00146	0.00164	-0.00071	-0.00203	-0.00054	0.00181
27	-0.00733	-0.00901	0.00738	0.00155	-0.00273	-0.00458	-0.00525	0.00084	4e-05
28	0.00377	0.00066	-0.00064	-0.00106	-0.00321	-0.00112	0.00838	-0.00159	-0.00397
29	-0.00226	-0.00077	0.00422	0.00364	0.00015	0.00389	0.01806	0.00182	-0.00969
30	-0.00473	-0.00264	-0.01156	0.00186	0.0078	-0.00073	-0.00052	-0.00391	0.00106
31	-0.00345	0.00415	0.00423	0.00105	0.0034	-0.00708	0.00927	0.00285	-0.0015
32	-0.00716	0.00284	-0.00707	0.00366	0.00442	0.00153	0.00157	0.00511	0.01272
33	-0.01408	0.00114	0.0071	-0.00234	-0.00148	0.00651	-0.009	0.00274	0.0065
34	-0.01128	-0.00198	0.00259	0.00097	0.00016	-0.00085	0.00136	-0.0008	0.00381
35	0.01494	3e-05	0.00341	-0.00214	-0.00587	0.00464	0.0093	-0.00624	-0.00245
36	0.00055	0.00224	0.00044	0.00503	-0.00517	-0.00013	-0.00317	0.00921	7e-05
37	0.00838	-0.00124	-0.00163	-0.00253	0.00293	-0.00121	-0.0029	-0.00163	0.00099
38	0.0006	-0.00196	0.01126	-0.00072	0.0029	0.00044	0.00217	0.00184	-0.01564
39	0.00651	0.00672	0.03224	0.00118	-0.00583	-0.00492	-0.01823	-0.0298	-0.03447
40	0.01521	-0.00132	-0.00041	0.00295	-0.00084	0.00117	0.01161	-0.00021	-0.01139
41	-0.00977	0.00333	0.00666	-0.00371	-0.00102	0.00241	-0.00322	-0.00801	-0.0097
42	0.00604	0.00022	-0.00516	0.00089	0.01026	0.00297	0.00489	-0.00797	0.00159
43	0.01537	0.0084	0.01151	-0.00245	-0.00656	0.00187	-0.01086	0.00035	-0.01354
44	-0.00704	0.00373	-0.00124	-0.00526	0.00183	0.00024	0.00971	0.00157	0.00928
45	0.00894	0.00235	-0.00563	-0.00264	0.0026	-0.00116	0.02076	-0.00287	-0.01487
46	0.01115	0.00614	-0.0002	-0.00528	-0.00156	0.00256	0.00072	-0.00732	0.00014
47	0.00703	0.0089	-0.01054	-0.00033	0.00226	-0.0008	0.01557	-0.00906	0.00646
48	-0.00454	0.00562	0.00069	-0.0008	0.00246	0.00034	0.00119	-0.00528	0.00085
49	-0.00263	0.00435	-0.00799	0.00275	0.00132	-0.00058	0.00678	-0.01228	-0.00113
50	-0.01005	-0.00048	0.00082	0.00041	-0.00052	0.00457	-0.01592	-0.00025	0.00846
51	0.00589	-0.0086	-0.00231	-0.00023	-0.00442	-0.0056	0.00224	0.01384	0.00158
52	-0.00115	0.00127	0.00181	0.00101	-0.00339	-0.005	0.00464	0.0026	-0.00026
0	-0.00824	-0.00018	0.00443	-0.00459	0.00201	0.00236	0.01373	-0.00112	0.00533
1	0.00322	0.00127	0.00902	-0.01761	-0.00475	-0.00119	-0.00985	0.01184	0.00302
2	-0.00519	0.00532	0.00512	-0.00166	-0.00333	0.00012	-0.00407	-0.01098	0.00243
3	0.00028	-0.00251	-0.00556	-0.00495	0.00152	-0.00259	0.01001	-0.01697	-0.00287
4	-0.01596	-0.00074	0.01656	-0.00683	-0.00246	0.00119	-0.00602	0.00117	-0.0004
5	0.00198	-0.00132	0.02362	-0.00624	-0.002	-0.00379	-0.01743	-0.01297	-0.02867
6	0.00506	-0.00832	-0.00359	0.00403	-0.00389	-0.0013	0.00783	-0.00523	0.00527
7	6e-05	-0.00162	0.00906	-0.00281	-0.00051	-0.00196	0.01163	-0.00371	-0.00349
8	-0.00654	-0.00198	-0.00329	-0.00709	0.00051	-0.00698	0.01633	-0.00894	0.00746
9	-0.01794	-0.0007	-0.00403	-0.00904	0.00285	-0.00592	0.015	-0.00745	0.01399
10	0.00541	-0.00943	0.00136	-0.00577	-0.0021	-0.00334	0.01287	0.00795	0.00319
11	-0.0059	-0.00678	-0.00215	-0.00055	0.00096	-0.00038	0.0027	-0.00137	0.00851
12	0.0007	-0.00652	-0.00245	-0.00281	0.00206	0.00293	0.01762	-0.00528	0.00069
13	0.00526	-0.00478	0.00193	0.00107	0.00148	-0.0013	0.0102	0.00461	0.00311
14	-0.01334	0.00272	0.00193	-0.00898	-0.00481	-0.0084	0.00384	-0.00105	0.00704
15	-0.00706	0.00325	-0.00111	-0.00332	0.00274	-0.00188	-0.0145	0.00141	0.0129
16	0.00051	-0.00518	0.00286	-0.00999	0.00413	-8e-05	0.01785	-0.01022	-0.00369
17	0.00289	-0.00341	0.00666	-0.00945	-0.0042	-0.00214	-0.00374	-0.0078	0.00323
18	-0.00291	0.00183	0.00407	-0.01148	-0.00447	-0.00165	0.00021	-0.0212	-0.00143
19	-0.00281	0.00786	-0.00316	-0.00442	0.00087	-0.00592	0.0206	-0.00757	-0.00493
20	0.004	0.00049	0.00071	-0.00274	-0.01044	-0.00235	0.02524	0.00068	-0.00064
21	0.00574	-0.00535	0.00584	-0.00661	-0.00275	-0.00107	0.01767	-0.00746	-0.00898
22	-0.00694	0.00072	-0.01046	-0.00325	0.00227	0.00498	0.00768	0.00556	0.01153
23	0.0033	-0.00868	0.00821	-0.00537	0.00045	-0.00283	0.00781	-0.00075	0.00123
24	-0.00152	-0.00421	-0.00141	0.00111	-0.00354	-0.00402	0.01149	0.01009	0.01567
25	-0.00172	0.00743	1e-05	-0.00124	-0.002	-0.00581	0.01085	0.00138	-0.00032
26	0.00904	-0.00029	-0.0085	-0.0056	-0.00526	-0.00566	0.01083	-0.00921	0.01632
27	-0.01201	0.00387	0.00152	-0.00565	-0.00722	-0.00163	0.00434	-0.00163	0.00934
28	0.01438	0.00537	-0.0085	-0.00127	0.00239	-0.00286	0.01698	-0.01357	-0.00988
29	-0.00665	0.00353	0.00319	-0.00076	-0.00219	-0.00153	-0.01358	-0.00188	-0.00735
30	0.01387	-0.00102	-0.00241	-0.00349	-0.0018	-0.00252	-0.00102	0.00608	0.00386
31	0.00819	-0.00373	0.00244	0.00223	-0.00115	-0.00714	0.01984	-0.00533	-0.00574
32	-0.00096	0.00578	0.00426	-0.00732	0.00286	-0.0029	-0.02239	-0.00558	0.00545
33	0.0055	0.00154	0.01147	-0.00204	-0.0041	-0.00075	0.00285	-0.00893	-0.00519
34	0.00993	0.00275	0.00812	-0.01143	0.00121	0.00156	0.00632	-0.00741	-0.02102
35	0.01699	-0.00997	-0.0047	0.00383	-0.00011	0.00045	0.00902	0.00572	-0.01305
36	-0.01162	0.00016	0.00485	-0.01469	-0.00251	-0.00123	-0.00966	0.00034	0.00709
37	-0.00158	-0.00764	0.00378	0.00299	-0.00018	0.00142	0.01581	-0.00691	-0.00455
38	0.00337	-0.00171	0.00178	0.00257	-0.00236	0.00466	-0.00871	0.00456	-0.00096
39	-0.01114	0.00265	-0.00115	-0.00541	-0.00111	7e-05	-0.01088	-0.00495	0.01384
43	-0.00153	0.00144	0.00856	-0.00603	0.0102	-0.00015	-0.00109	-0.0002	-0.00155
44	0.00114	-0.00051	0.00231	0.00331	0.00624	-0.0055	-0.00209	-0.00093	0.0025
